# Supplementary material
Source: Research Square preprint supplement (doi:10.21203/rs.3.rs-9533656/v1)
Supplement: Supplementary file 1 [file 6af0f70d51f0ab9ddd13c96a.pdf]

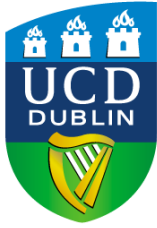

**UCD School of Medicine**

**Scoil an Leighis**

Academic General Practice  
C110 Health Sciences Centre  
Belfield, Dublin 4, Ireland

T +353 1 716 6696  
F +353 1 716 6549

### **Your Perspectives on Involvement in GP Research Network at UCD**

Dear Colleague

I am writing to say many thanks for your involvement in and support for the UCD / Ireland East GP Research Network in recent years. We are now concluding our initial programme of research and invite you to share your experiences and thoughts on your involvement in the research by completing a very brief survey. Your suggestions and insights will be most valuable in helping us plan the future development of the network - this will take approximately 10 minutes to complete.

**Google form link:** <https://forms.gle/NajkD1X6pjC5Cqjk9>

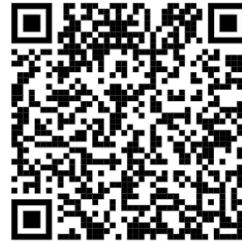

For your reference, we have enclosed the Study Instrument to this letter. Participant Information Leaflet and the consent form are available on the first page of the Google Form.

Regards,

Prof Walter Cullen

UCD School of Medicine, Room C317, UCD Health Sciences, Dublin 4, Ireland

T: +353 1 7166561

M: +353 86 8583586

E: [Walter.cullen@ucd.ie](mailto:Walter.cullen@ucd.ie)

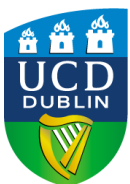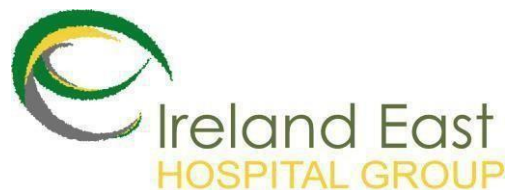

## Self-administered questionnaire with UCD/ IEHG GP Research Network members

1. What age are you?
  - <34
  - 35-49
  - >49
  
2. Gender
  - Man
  - Woman
  - Non-binary
  - Other
  - Prefer not to say
  
3. Type of practice
  - Mixed
  - Rural
  - Urban
  - Other \_\_\_\_\_
  
4. Type of practice.
  - Mostly GMS
  - Mixed
  - Mostly Private
  
5. Approximately how many patients are registered with your practice?  
\_\_\_\_\_
  
6. Approximately how many GMS patients are registered with your practice?  
\_\_\_\_\_
  
7. Approximately how many doctors currently work in your practice?  
\_\_\_\_\_
  
8. Approximately how many full time equivalent doctors currently work in your practice?  
\_\_\_\_\_
  
9. Approximately how many nurses currently work in your practice?  
\_\_\_\_\_
  
10. Approximately how many full time equivalent nurses currently work in your practice?  
\_\_\_\_\_
  
11. What IT system does your practice currently use?
  - GP Clinical
  - Health One
  - Helix Practice Manager
  - Socrates

- Other (please specify) \_\_\_\_\_

12. What projects did you participate in? (please select all that apply)

- Enhancing GP access to diagnostic imaging
- Long-COVID in general practice
- Reducing hospital re-admissions
- Atrial Fibrillation in general practice

13. How did taking part in these projects change your perspective towards research? (please select all that apply)

- Increased my interest and motivation
- Helped me collaborate better with others
- Made me more aware of research opportunities
- No significant change
- Other (please specify)

14. How satisfied are you with your involvement in the research network?

- 1- very dissatisfied
- 2 – Dissatisfied
- 3 – Neutral
- 4 – Satisfied
- 5 – Very satisfied

15. What was good about your involvement in the research network?

\_\_\_\_\_

16. How could we support practice-based research at your practice in future?

\_\_\_\_\_

17. Is enhancing integration between primary and secondary care a priority area for future research?

- a. Yes
- b. No

18. Are you interested in being involved in research that aims to enhance links between GP and hospital care?

- a. Yes
- b. No

19. For these statements, please rate from 1 to 5, where 1=strongly disagree and 5=strongly agree:

|                                                               | Rating (1-5) |
|---------------------------------------------------------------|--------------|
| General practices and the local hospitals are well integrated |              |
| General practices and the local primary care teams are well   |              |

|                                                                                                  |  |
|--------------------------------------------------------------------------------------------------|--|
| integrated                                                                                       |  |
| General practices and local NGOs involved in health and social care delivery are well integrated |  |

Lastly, we want to know how important these areas are for future research.

Please score from 1 (least important) to 5 (very important)

- Acute/ unscheduled care
- Chronic care
- Healthcare access and integration
- Knowledge transfer
- Medical Education
- Mental health
- Paediatric health
- Population health
- Women's health
- Other (please specify)
